# Supplementary material for: Domain-specific model selection for structural identification of the Rab5-Rab7 dynamics in endocytosis
Source: Springer Nature journal article supplement (doi:10.1186/s12918-015-0175-x), 2015-06-26
Supplement: 12918_2015_175_MOESM1_ESM.pdf [file 12918_2015_175_MOESM1_ESM.pdf]

# Domain-specific model selection for structural identification of the Rab5-Rab7 dynamics in endocytosis –Supplementary material–

Jovan Tanevski, Ljupčo Todorovski, Yannis Kalaidzidis, Sašo Džeroski

## Supplemental figures

|                                                                                                                                                                                                                                                                                                                                                                                                                             |    |
|-----------------------------------------------------------------------------------------------------------------------------------------------------------------------------------------------------------------------------------------------------------------------------------------------------------------------------------------------------------------------------------------------------------------------------|----|
| Figure 1 – Distribution of the structural components of all 126 candidate models considered in the experiments, as defined in the library. . . . .                                                                                                                                                                                                                                                                          | 4  |
| Figure 2 – Plot of the sorted complexities of the 126 candidate models. $C(m)$ represents the normalized complexity of the model. The complexity in the histogram is expressed in terms of the number of interactions present in the model. . . . .                                                                                                                                                                         | 5  |
| Figure 3 – The error profile obtained using the <i>ER</i> criterion and a trade-off parameter setting $\alpha = 0.5$ (left). The box plot shows the distribution of error in the profile (right). . . . .                                                                                                                                                                                                                   | 6  |
| Figure 4 – The error profile obtained using the <i>EX</i> criterion and a trade-off parameter setting $\alpha = 0.9$ (left). The box plot shows the distribution of error in the profile (right). . . . .                                                                                                                                                                                                                   | 7  |
| Figure 5 – The error profile obtained using the <i>ERX</i> criterion and a trade-off parameter setting $\alpha = 0.5$ (left). The box plot shows the distribution of error in the profile (right). . . . .                                                                                                                                                                                                                  | 8  |
| Figure 6 – Box plots of the distribution of errors in terms of E, ER (top) and EX, ERX (bottom) relative to the complexity C of the model structures. The correlations between the errors and the complexity of the model structures are as follows: $\rho(E, C) = -0.110$ , $\rho(ER, C) = -0.159$ , $\rho(EX, C) = 0.184$ , $\rho(ERX, C) = 0.168$ , where $\rho$ is the Spearman’s rank correlation coefficient. . . . . | 11 |
| Figure 7 – Correlation matrix for the parameters of the overall top-ranked model obtained using the bootstrap method. The names of the parameters for each row/column are shown in the main diagonal. The matrix is symmetric. Above the main diagonal, the values of the correlations correspond to the Pearson correlation coefficient. . . . .                                                                           | 13 |
| Figure 8 – Histograms of the estimated parameter values of the overall top-ranked model obtained using the bootstrap method. In each histogram, the yellow horizontal line represents the 95% confidence interval and the green vertical line represents the mean of the outliers-filtered sample. The width of the bins is calculated according to the Freedman-Diaconis rule. . . . .                                     | 14 |

|                                                                                                                                                                                                                                                                                                                                                                                                    |    |
|----------------------------------------------------------------------------------------------------------------------------------------------------------------------------------------------------------------------------------------------------------------------------------------------------------------------------------------------------------------------------------------------------|----|
| Figure 9 – Correlation matrix for the parameters of the top-ranked model from the COT group obtained using the bootstrap method. The names of the parameters for each row/column are shown in the main diagonal. The matrix is symmetric. Above the main diagonal, the values of the correlations correspond to the Pearson correlation coefficient. . . . .                                       | 16 |
| Figure 10– Histograms of the estimated parameter values of the top-ranked model from the COT group obtained using the bootstrap method. In each histogram, the yellow horizontal line represents the 95% confidence interval and the green vertical line represents the mean of the outliers-filtered sample. The width of the bins is calculated according to the Freedman-Diaconis rule. . . . . | 17 |
| Figure 11– Correlation matrix for the parameters of the top-ranked model from the IP group obtained using the bootstrap method. The names of the parameters for each row/column are shown in the main diagonal. The matrix is symmetric. Above the main diagonal, the values of the correlations correspond to the Pearson correlation coefficient. . . . .                                        | 19 |
| Figure 12– Histograms of the estimated parameter values of the top-ranked model from the IP group obtained using the bootstrap method. In each histogram, the yellow horizontal line represents the 95% confidence interval and the green vertical line represents the mean of the outliers-filtered sample. The width of the bins is calculated according to the Freedman-Diaconis rule. . . . .  | 20 |

## Supplemental tables

|                                                                                                                                                                                                                                                                                                                                                                                                                                                                                                                                                                                                                                                                                                                                                                                                        |    |
|--------------------------------------------------------------------------------------------------------------------------------------------------------------------------------------------------------------------------------------------------------------------------------------------------------------------------------------------------------------------------------------------------------------------------------------------------------------------------------------------------------------------------------------------------------------------------------------------------------------------------------------------------------------------------------------------------------------------------------------------------------------------------------------------------------|----|
| Table 1 – Detailed description of the structure and the performance of the models in the plateau obtained using the <i>ERX</i> criterion with $\alpha = 0.5$ . . . . .                                                                                                                                                                                                                                                                                                                                                                                                                                                                                                                                                                                                                                 | 9  |
| Table 2 – Detailed description of the structure and the performance of the most complex and least complex models in the plateau obtained using the <i>ERX</i> criterion with $\alpha = 0.5$ . . . . .                                                                                                                                                                                                                                                                                                                                                                                                                                                                                                                                                                                                  | 10 |
| Table 3 – Summary of the identifiability analysis for the estimated parameter values in the overall top-ranked model using the bootstrap method. The column estimate contains the values in the model obtained using ProBMoT. The column Mean contains the mean of the outliers-filtered sample. The $C^{lo}$ and $C^{hi}$ columns contain the lower and upper bound of the 95% confidence interval. The $C^L$ and $C^{sh}$ columns contain the length and the shape of the confidence interval, where $C^L = C^{lo} - C^{hi}$ and $C^{sh} = \frac{C^{hi} - Mean}{Mean - C^{lo}}$ . Assuming a confidence interval for a normal distribution, $C^{sh} = 1$ and the interval is symmetric about the mean, the column outliers contains the number of outliers from a sample of 1000. . . . .            | 12 |
| Table 4 – Summary of the identifiability analysis for the estimated parameter values in the top-ranked model from the COT group using the bootstrap method. The column estimate contains the values in the model obtained using ProBMoT. The column Mean contains the mean of the outliers-filtered sample. The $C^{lo}$ and $C^{hi}$ columns contain the lower and upper bound of the 95% confidence interval. The $C^L$ and $C^{sh}$ columns contain the length and the shape of the confidence interval, where $C^L = C^{lo} - C^{hi}$ and $C^{sh} = \frac{C^{hi} - Mean}{Mean - C^{lo}}$ . Assuming a confidence interval for a normal distribution, $C^{sh} = 1$ and the interval is symmetric about the mean, the column outliers contains the number of outliers from a sample of 1000. . . . . | 15 |

Table 5 – Summary of the identifiability analysis for the estimated parameter values in the top-ranked model from the IP group using the bootstrap method. The column estimate contains the values in the model obtained using ProBMoT. The column Mean contains the mean of the outliers-filtered sample. The  $C^{lo}$  and  $C^{hi}$  columns contain the lower and upper bound of the 95% confidence interval. The  $C^L$  and  $C^{sh}$  columns contain the length and the shape of the confidence interval, where  $C^L = C^{lo} - C^{hi}$  and  $C^{sh} = \frac{C^{hi} - Mean}{Mean - C^{lo}}$ . Assuming a confidence interval for a normal distribution,  $C^{sh} = 1$  and the interval is symmetric about the mean, the column outliers contains the number of outliers from a sample of 1000. . . . . 18

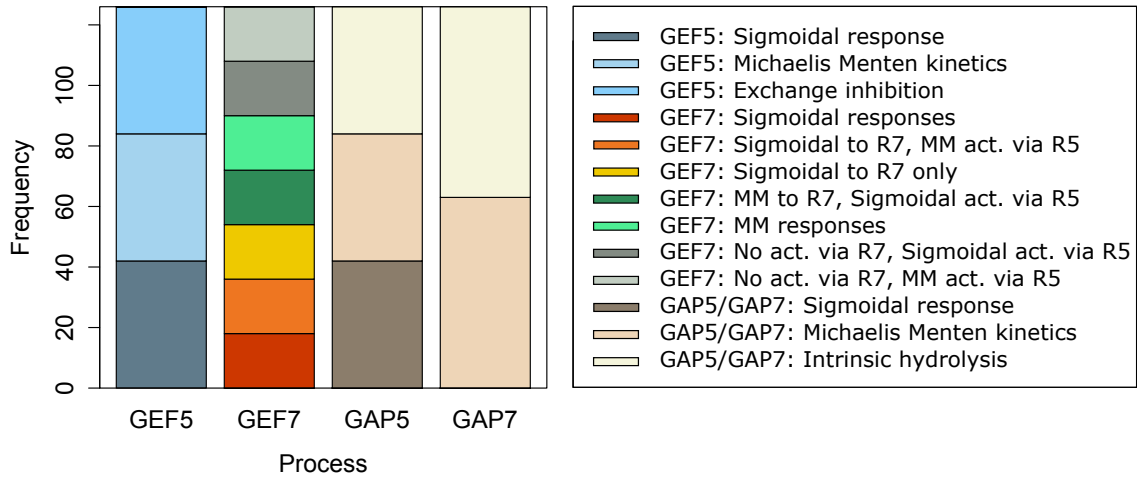

Figure 1: Distribution of the structural components of all 126 candidate models considered in the experiments, as defined in the library.

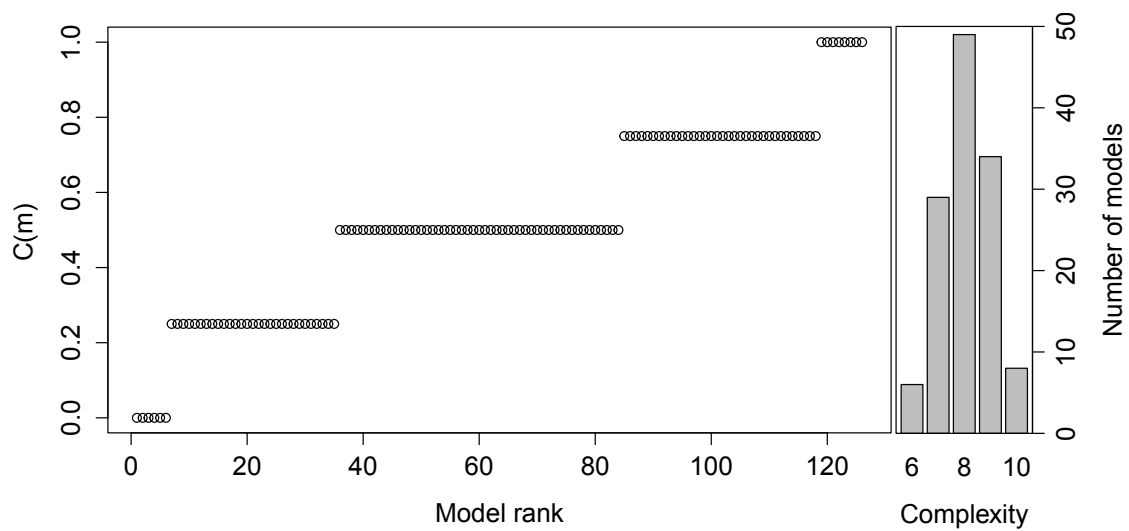

Figure 2: Plot of the sorted complexities of the 126 candidate models.  $C(m)$  represents the normalized complexity of the model. The complexity in the histogram is expressed in terms of the number of interactions present in the model.

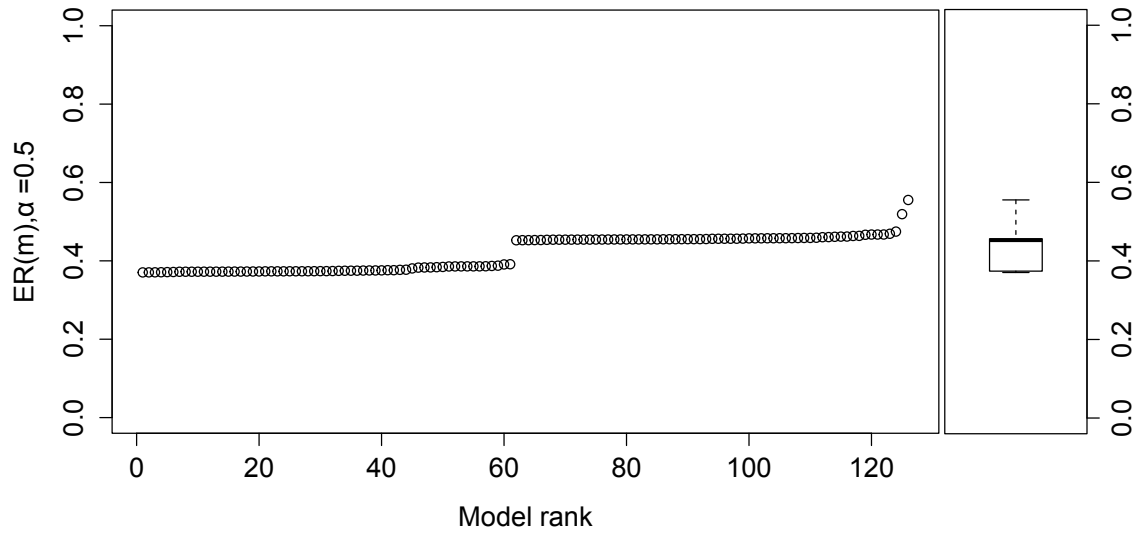

Figure 3: The error profile obtained using the  $ER$  criterion and a trade-off parameter setting  $\alpha = 0.5$  (left). The box plot shows the distribution of error in the profile (right).

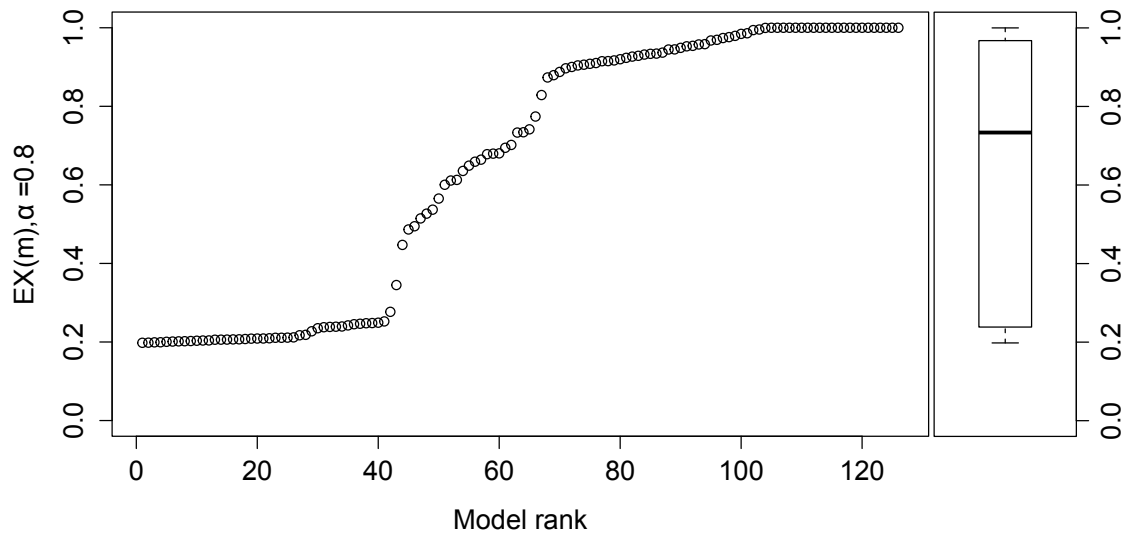

Figure 4: The error profile obtained using the *EX* criterion and a trade-off parameter setting  $\alpha = 0.9$  (left). The box plot shows the distribution of error in the profile (right).

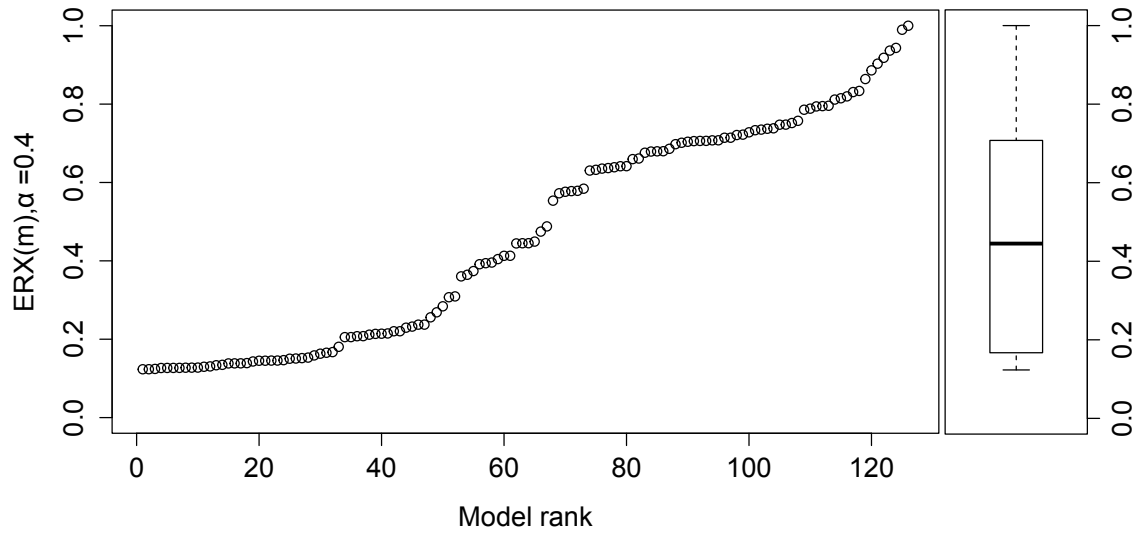

Figure 5: The error profile obtained using the *ERX* criterion and a trade-off parameter setting  $\alpha = 0.5$  (left). The box plot shows the distribution of error in the profile (right).



Table 1: Detailed description of the structure and the performance of the models in the plateau obtained using the *ERX* criterion with  $\alpha = 0.5$ .

| Rank | Model | Group | Structure           |                      |                     |                    |                      | Performance |       |       |       |      |
|------|-------|-------|---------------------|----------------------|---------------------|--------------------|----------------------|-------------|-------|-------|-------|------|
|      |       |       | GEF5                | GAP5                 | GEF7 auto catalysis | GEF7 via Rab5      | GAP7                 | E           | R     | X     | ERX   | C    |
| 1    | 74    | OTHER | Sigmoidal_response  | Intrinsic_hydrolysis | Sigmoidal_response  | None               | MMenten              | 0.224       | 0.045 | 0.010 | 0.126 | 0.50 |
| 2    | 77    | OTHER | Sigmoidal_response  | Intrinsic_hydrolysis | Sigmoidal_response  | None               | MMenten              | 0.224       | 0.045 | 0.010 | 0.126 | 0.25 |
| 3    | 104   | OTHER | Sigmoidal_response  | MMenten              | None                | Sigmoidal_response | MMenten_kinetics     | 0.226       | 0.045 | 0.010 | 0.127 | 0.50 |
| 4    | 86    | COT   | Sigmoidal_response  | MMenten              | MMenten_kinetics    | MMenten_kinetics   | MMenten_kinetics     | 0.233       | 0.040 | 0.010 | 0.129 | 0.75 |
| 5    | 23    | IP    | Sigmoidal_response  | MMenten              | MMenten_kinetics    | MMenten_kinetics   | MMenten_kinetics     | 0.230       | 0.047 | 0.010 | 0.129 | 0.50 |
| 6    | 101   | OTHER | Sigmoidal_response  | MMenten              | None                | MMenten_kinetics   | MMenten_kinetics     | 0.228       | 0.050 | 0.010 | 0.129 | 0.50 |
| 7    | 41    | IP    | Sigmoidal_response  | MMenten              | None                | Sigmoidal_response | Sigmoidal_response   | 0.231       | 0.045 | 0.010 | 0.129 | 0.25 |
| 8    | 71    | OTHER | Sigmoidal_response  | Intrinsic_hydrolysis | Sigmoidal_response  | Sigmoidal_response | MMenten_kinetics     | 0.232       | 0.041 | 0.010 | 0.129 | 0.50 |
| 9    | 38    | IP    | Sigmoidal_response  | MMenten              | None                | MMenten_kinetics   | MMenten_kinetics     | 0.233       | 0.044 | 0.010 | 0.130 | 0.25 |
| 10   | 60    | OTHER | Exchange_inhibition | Sigmoidal            | None                | MMenten_kinetics   | MMenten_kinetics     | 0.233       | 0.044 | 0.010 | 0.130 | 0.50 |
| 11   | 59    | IP    | Sigmoidal_response  | Sigmoidal            | None                | MMenten_kinetics   | MMenten_kinetics     | 0.234       | 0.051 | 0.010 | 0.132 | 0.25 |
| 12   | 125   | OTHER | Sigmoidal_response  | Sigmoidal            | None                | Sigmoidal_response | Sigmoidal_response   | 0.234       | 0.051 | 0.010 | 0.132 | 0.50 |
| 13   | 29    | COT   | Sigmoidal_response  | Sigmoidal            | Sigmoidal_response  | Sigmoidal_response | MMenten_kinetics     | 0.241       | 0.046 | 0.010 | 0.134 | 0.50 |
| 14   | 8     | COT   | Sigmoidal_response  | Intrinsic_hydrolysis | Sigmoidal_response  | MMenten_kinetics   | MMenten_kinetics     | 0.247       | 0.042 | 0.010 | 0.137 | 0.25 |
| 15   | 44    | IP    | Sigmoidal_response  | Sigmoidal            | MMenten_kinetics    | MMenten_kinetics   | MMenten_kinetics     | 0.254       | 0.044 | 0.010 | 0.140 | 0.50 |
| 16   | 83    | OTHER | Sigmoidal_response  | Intrinsic_hydrolysis | None                | Sigmoidal_response | Sigmoidal_response   | 0.259       | 0.035 | 0.010 | 0.141 | 0.25 |
| 17   | 98    | OTHER | Sigmoidal_response  | MMenten              | Sigmoidal_response  | None               | None                 | 0.259       | 0.035 | 0.010 | 0.141 | 0.50 |
| 18   | 95    | OTHER | Sigmoidal_response  | MMenten              | Sigmoidal_response  | Sigmoidal_response | Sigmoidal_response   | 0.260       | 0.036 | 0.010 | 0.142 | 0.75 |
| 19   | 107   | COT   | Sigmoidal_response  | Sigmoidal            | MMenten_kinetics    | MMenten_kinetics   | MMenten_kinetics     | 0.266       | 0.041 | 0.010 | 0.145 | 0.75 |
| 20   | 119   | OTHER | Sigmoidal_response  | Sigmoidal            | Sigmoidal_response  | None               | None                 | 0.260       | 0.041 | 0.037 | 0.150 | 0.50 |
| 21   | 26    | IP    | Sigmoidal_response  | MMenten              | MMenten_kinetics    | Sigmoidal_response | Sigmoidal_response   | 0.258       | 0.064 | 0.010 | 0.148 | 0.50 |
| 22   | 5     | IP    | Sigmoidal_response  | Intrinsic_hydrolysis | MMenten_kinetics    | Sigmoidal_response | Sigmoidal_response   | 0.259       | 0.063 | 0.010 | 0.148 | 0.25 |
| 23   | 122   | OTHER | Sigmoidal_response  | Sigmoidal            | None                | Sigmoidal_response | Sigmoidal_response   | 0.270       | 0.039 | 0.010 | 0.148 | 0.50 |
| 24   | 116   | OTHER | Sigmoidal_response  | Sigmoidal            | Sigmoidal_response  | Sigmoidal_response | Sigmoidal_response   | 0.273       | 0.04  | 0.010 | 0.149 | 0.75 |
| 25   | 50    | COT   | Sigmoidal_response  | Sigmoidal            | Sigmoidal_response  | MMenten_kinetics   | MMenten_kinetics     | 0.277       | 0.045 | 0.010 | 0.152 | 0.50 |
| 26   | 56    | COT   | Sigmoidal_response  | Sigmoidal            | Sigmoidal_response  | None               | None                 | 0.281       | 0.041 | 0.010 | 0.153 | 0.25 |
| 27   | 113   | OTHER | Sigmoidal_response  | Sigmoidal            | Sigmoidal_response  | Sigmoidal_response | MMenten_kinetics     | 0.282       | 0.040 | 0.010 | 0.154 | 0.75 |
| 28   | 110   | COT   | Sigmoidal_response  | Sigmoidal            | MMenten_kinetics    | Sigmoidal_response | Sigmoidal_response   | 0.282       | 0.041 | 0.010 | 0.154 | 0.75 |
| 29   | 53    | COT   | Sigmoidal_response  | Sigmoidal            | Sigmoidal_response  | Sigmoidal_response | Sigmoidal_response   | 0.240       | 0.154 | 0.010 | 0.161 | 0.50 |
| 30   | 14    | COT   | Sigmoidal_response  | Intrinsic_hydrolysis | Sigmoidal_response  | None               | Intrinsic_hydrolysis | 0.243       | 0.166 | 0.010 | 0.166 | 0.00 |
| 31   | 4     | OTHER | Mmenten_kinetics    | Intrinsic_hydrolysis | MMenten_kinetics    | Sigmoidal_response | Sigmoidal_response   | 0.306       | 0.050 | 0.010 | 0.168 | 0.25 |
| 32   | 35    | COT   | Sigmoidal_response  | MMenten              | Sigmoidal_response  | None               | None                 | 0.247       | 0.172 | 0.010 | 0.169 | 0.25 |
| 33   | 124   | OTHER | MMenten_kinetics    | Sigmoidal            | None                | Sigmoidal_response | Sigmoidal_response   | 0.325       | 0.062 | 0.037 | 0.187 | 0.50 |

Table 2: Detailed description of the structure and the performance of the most complex and least complex models in the plateau obtained using the *ERX* criterion with  $\alpha = 0.5$ .

| Rank | Model | Group | Structure           |                      |                     |                    |                      | Performance |       |       |       | C    |
|------|-------|-------|---------------------|----------------------|---------------------|--------------------|----------------------|-------------|-------|-------|-------|------|
|      |       |       | GEF5                | GAP5                 | GEF7 auto catalysis | GEF7 via Rab5      | GAP7                 | E           | R     | X     | ERX   |      |
| 30   | 14    | COT   | Sigmoidal_response  | Intrinsic_hydrolysis | Sigmoidal_response  | None               | Intrinsic_hydrolysis | 0.242       | 0.166 | 0.010 | 0.166 | 0.00 |
| 38   | 17    | IP    | Sigmoidal_response  | Intrinsic_hydrolysis | None                | MMenten_kinetics   | Intrinsic_hydrolysis | 0.401       | 0.044 | 0.010 | 0.214 | 0.00 |
| 43   | 20    | IP    | Sigmoidal_response  | Intrinsic_hydrolysis | None                | Sigmoidal_response | Intrinsic_hydrolysis | 0.406       | 0.069 | 0.010 | 0.223 | 0.00 |
| 69   | 111   | OTHER | Exchange_Inhibition | Sigmoidal            | MMenten_kinetics    | Sigmoidal_response | MMenten              | 1.000       | 0.200 | 0.080 | 0.573 | 1.00 |
| 82   | 114   | OTHER | Exchange_Inhibition | Sigmoidal            | Sigmoidal_response  | MMenten_kinetics   | MMenten              | 1.163       | 0.240 | 0.080 | 0.662 | 1.00 |
| 86   | 93    | OTHER | Exchange_Inhibition | MMenten              | Sigmoidal_response  | MMenten_kinetics   | MMenten              | 1.188       | 0.272 | 0.075 | 0.681 | 1.00 |
| 92   | 96    | OTHER | Exchange_Inhibition | MMenten              | Sigmoidal_response  | Sigmoidal_response | MMenten              | 1.054       | 0.636 | 0.081 | 0.710 | 1.00 |
| 95   | 16    | OTHER | MMenten_kinetics    | Intrinsic_hydrolysis | None                | MMenten_kinetics   | Intrinsic_hydrolysis | 0.982       | 0.787 | 0.080 | 0.710 | 0.00 |
| 96   | 117   | OTHER | Exchange_Inhibition | Sigmoidal            | Sigmoidal_response  | Sigmoidal_response | MMenten              | 0.999       | 0.780 | 0.080 | 0.714 | 1.00 |
| 99   | 19    | OTHER | MMenten_kinetics    | Intrinsic_hydrolysis | None                | Sigmoidal_response | Intrinsic_hydrolysis | 1.183       | 0.440 | 0.081 | 0.722 | 0.00 |
| 114  | 87    | OTHER | Exchange_Inhibition | MMenten              | MMenten_kinetics    | MMenten_kinetics   | MMenten              | 1.197       | 0.772 | 0.080 | 0.812 | 1.00 |
| 116  | 13    | OTHER | MMenten_kinetics    | Intrinsic_hydrolysis | Sigmoidal_response  | None               | Intrinsic_hydrolysis | 1.152       | 0.900 | 0.076 | 0.820 | 0.00 |
| 124  | 108   | OTHER | Exchange_Inhibition | Sigmoidal            | MMenten_kinetics    | MMenten_kinetics   | MMenten              | 1.130       | 1.000 | 1.000 | 1.070 | 1.00 |
| 125  | 90    | OTHER | Exchange_Inhibition | MMenten              | MMenten_kinetics    | Sigmoidal_response | MMenten              | 1.172       | 1.000 | 1.000 | 1.086 | 1.00 |

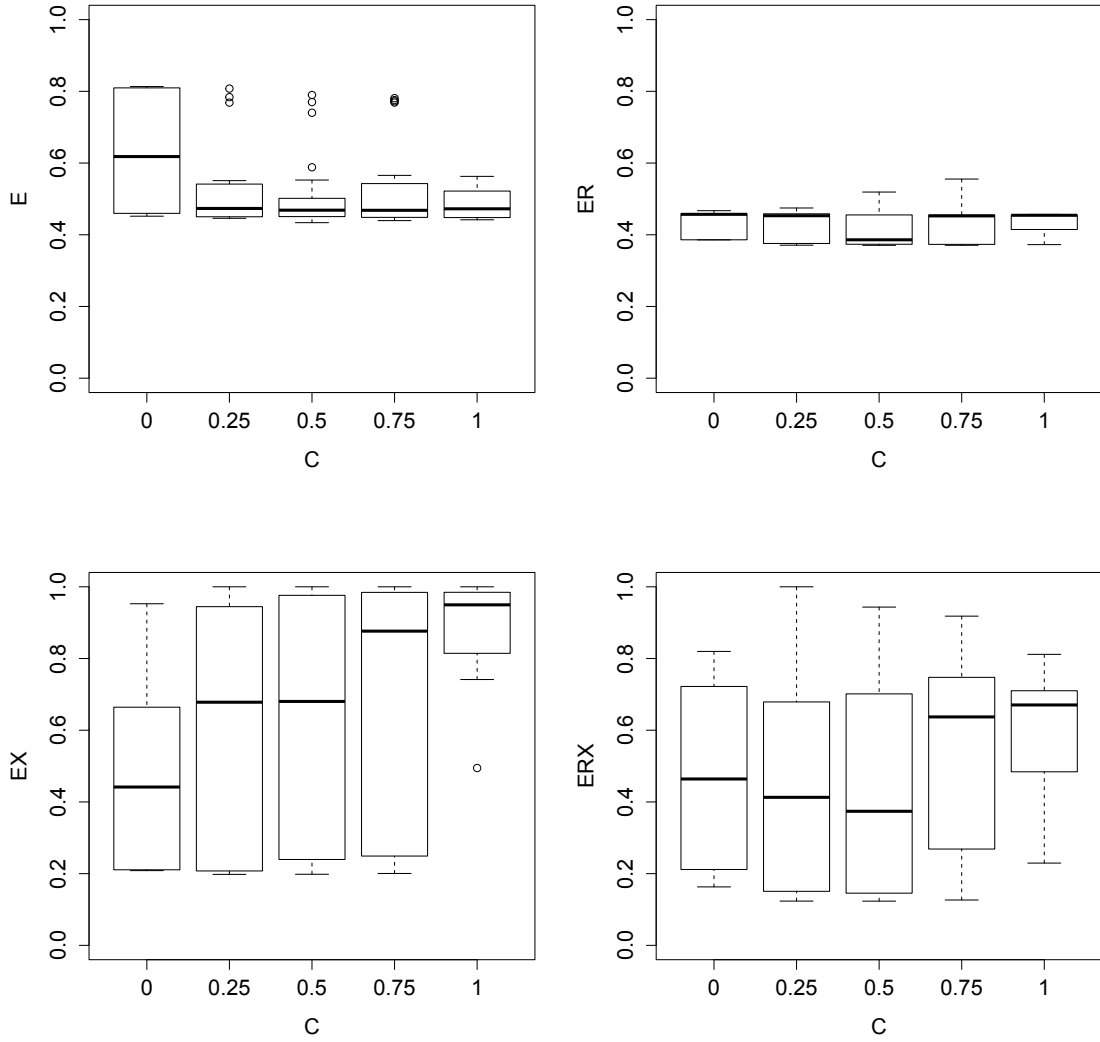

Figure 6: Box plots of the distribution of errors in terms of  $E$ ,  $ER$  (top) and  $EX$ ,  $ERX$  (bottom) relative to the complexity  $C$  of the model structures. The correlations between the errors and the complexity of the model structures are as follows:  $\rho(E, C) = -0.110$ ,  $\rho(ER, C) = -0.159$ ,  $\rho(EX, C) = 0.184$ ,  $\rho(ERX, C) = 0.168$ , where  $\rho$  is the Spearman's rank correlation coefficient.

Top ranked model:

$$\begin{aligned}
\frac{dr_5}{dt} &= K_1 - \left(k_1 + \frac{k_{e,5}}{1 + e^{(k_{g,5}-R_5) \cdot k_{f,5}}}\right) \cdot r_5 + k_{h,5} \cdot R_5 \\
\frac{dR_5}{dt} &= \frac{k_{e,5}}{1 + e^{(k_{g,5}-R_5) \cdot k_{f,5}}} \cdot r_5 - k_{h,5} \cdot R_5 \\
\frac{dr_7}{dt} &= K_2 - \left(k_2 + \frac{k_{e,7}}{1 + e^{(k_{g,7}-R_7) \cdot k_{f,7}}} + \frac{k_{E,7}}{1 + e^{(k_{G,7}-R_5) \cdot k_{F,7}}}\right) \cdot r_7 + k_{h,7} + \frac{k_{H,7} \cdot R_5}{k_{y,7} + R_5} \cdot R_7 \\
\frac{dR_7}{dt} &= \frac{k_{e,7}}{1 + e^{(k_{g,7}-R_7) \cdot k_{f,7}}} + \frac{k_{E,7}}{1 + e^{(k_{G,7}-R_5) \cdot k_{F,7}}} \cdot r_7 - k_{h,7} + \frac{k_{H,7} \cdot R_5}{k_{y,7} + R_5} \cdot R_7
\end{aligned} \tag{1}$$

Table 3: Summary of the identifiability analysis for the estimated parameter values in the overall top-ranked model using the bootstrap method. The column estimate contains the values in the model obtained using ProBMoT. The column Mean contains the mean of the outliers-filtered sample. The  $C^{lo}$  and  $C^{hi}$  columns contain the lower and upper bound of the 95% confidence interval. The  $C^L$  and  $C^{sh}$  columns contain the length and the shape of the confidence interval, where  $C^L = C^{lo} - C^{hi}$  and  $C^{sh} = \frac{C^{hi} - \text{Mean}}{\text{Mean} - C^{lo}}$ . Assuming a confidence interval for a normal distribution,  $C^{sh} = 1$  and the interval is symmetric about the mean, the column outliers contains the number of outliers from a sample of 1000.

| Parameter | Estimate | Mean     | $C^{lo}$ | $C^{hi}$ | $C^L$    | $C^{sh}$ | Outliers |
|-----------|----------|----------|----------|----------|----------|----------|----------|
| r5(0)     | 2        | 1.892    | 1.555    | 2        | 0.445    | 0.318    | 143      |
| R5(0)     | 1.603    | 1.511    | 1.308    | 1.747    | 0.438    | 1.164    | 191      |
| K1        | 0.098    | 0.132    | 0.111    | 0.155    | 0.044    | 1.132    | 209      |
| k1        | 0.119    | 0.139    | 0.122    | 0.158    | 0.036    | 1.094    | 163      |
| r7(0)     | 0.097    | 0.187    | 0        | 0.485    | 0.485    | 1.590    | 27       |
| R7(0)     | 0.305    | 0.107    | 0        | 0.310    | 0.310    | 1.888    | 5        |
| K2        | 0.141    | 0.223    | 0.001    | 0.623    | 0.622    | 1.800    | 141      |
| k2        | 0.093    | 1.132    | 0.001    | 3.772    | 3.771    | 2.333    | 0        |
| td        | 31.744   | 104.918  | 5        | 195      | 190      | 0.901    | 0        |
| ke,5      | 0.001    | 0.001    | 0.001    | 0.001    | 0.000    | 11.104   | 192      |
| kf,5      | 0.744    | 2.750    | 0.001    | 4        | 3.999    | 0.454    | 0        |
| kg,5      | 3.317    | 3.320    | 0.914    | 4        | 3.085    | 0.282    | 79       |
| ke,7      | 2.488    | 1.888    | 0.001    | 4        | 3.999    | 1.118    | 0        |
| kf,7      | 0.001    | 1.174    | 0.001    | 4        | 3.999    | 2.406    | 0        |
| kg,7      | 0.675    | 1.868    | 0.001    | 4        | 3.999    | 1.141    | 0        |
| kh,5      | 0.013    | 0.013    | 0.013    | 0.014    | 0.001    | 1.193    | 170      |
| kH,7      | 3.144    | 0.710    | 0.001    | 2.071    | 2.070    | 1.919    | 19       |
| ky,7      | 4        | 3.714    | 2.830    | 4        | 1.169    | 0.323    | 99       |
| kh,7      | 2.946    | 0.497    | 0.001    | 1.218    | 1.217    | 1.450    | 3        |
| kE,7      | 3.890    | 3.271    | 1.754    | 4        | 2.245    | 0.479    | 82       |
| kF,7      | 3.821    | 2.007    | 0.001    | 4        | 3.999    | 0.992    | 0        |
| kG,7      | 0.142    | 0.742    | 0.001    | 2.988    | 2.987    | 3.031    | 94       |
| K         | 7946.916 | 8304.990 | 7287.316 | 9371.584 | 2084.267 | 1.048    | 107      |

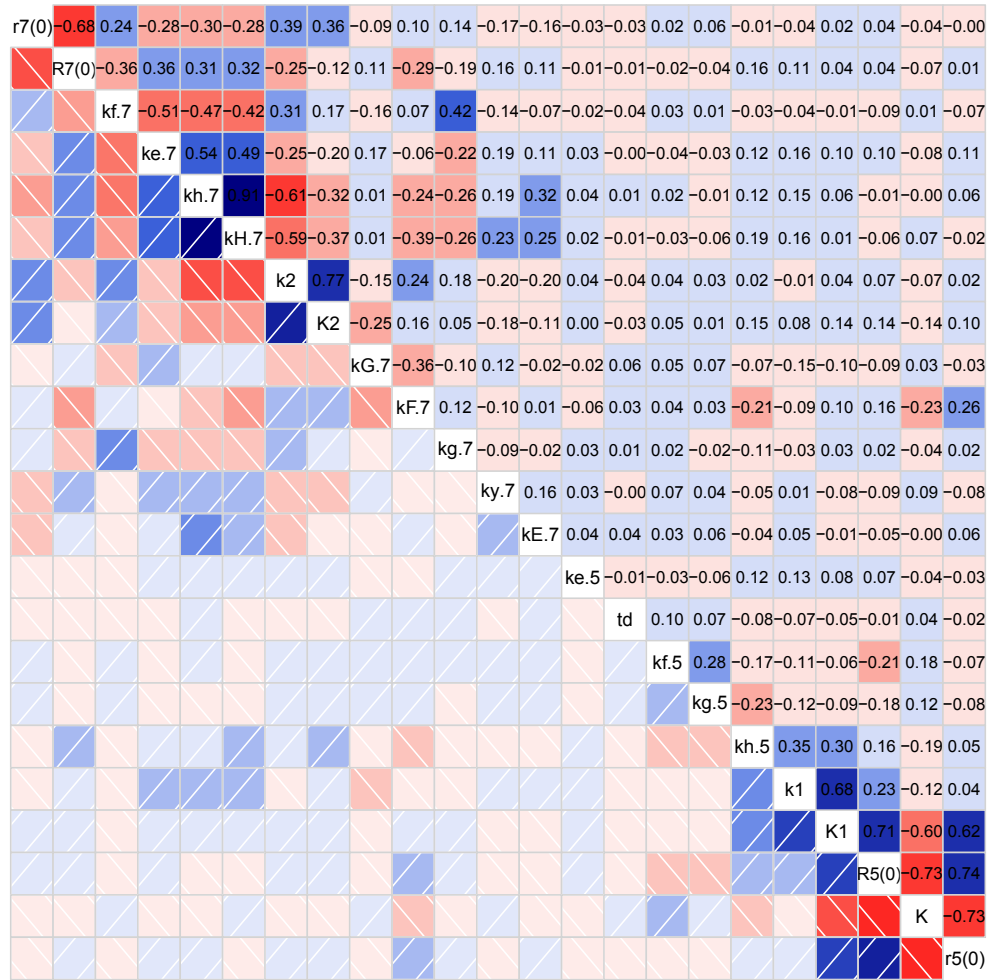

Figure 7: Correlation matrix for the parameters of the overall top-ranked model obtained using the bootstrap method. The names of the parameters for each row/column are shown in the main diagonal. The matrix is symmetric. Above the main diagonal, the values of the correlations correspond to the Pearson correlation coefficient.

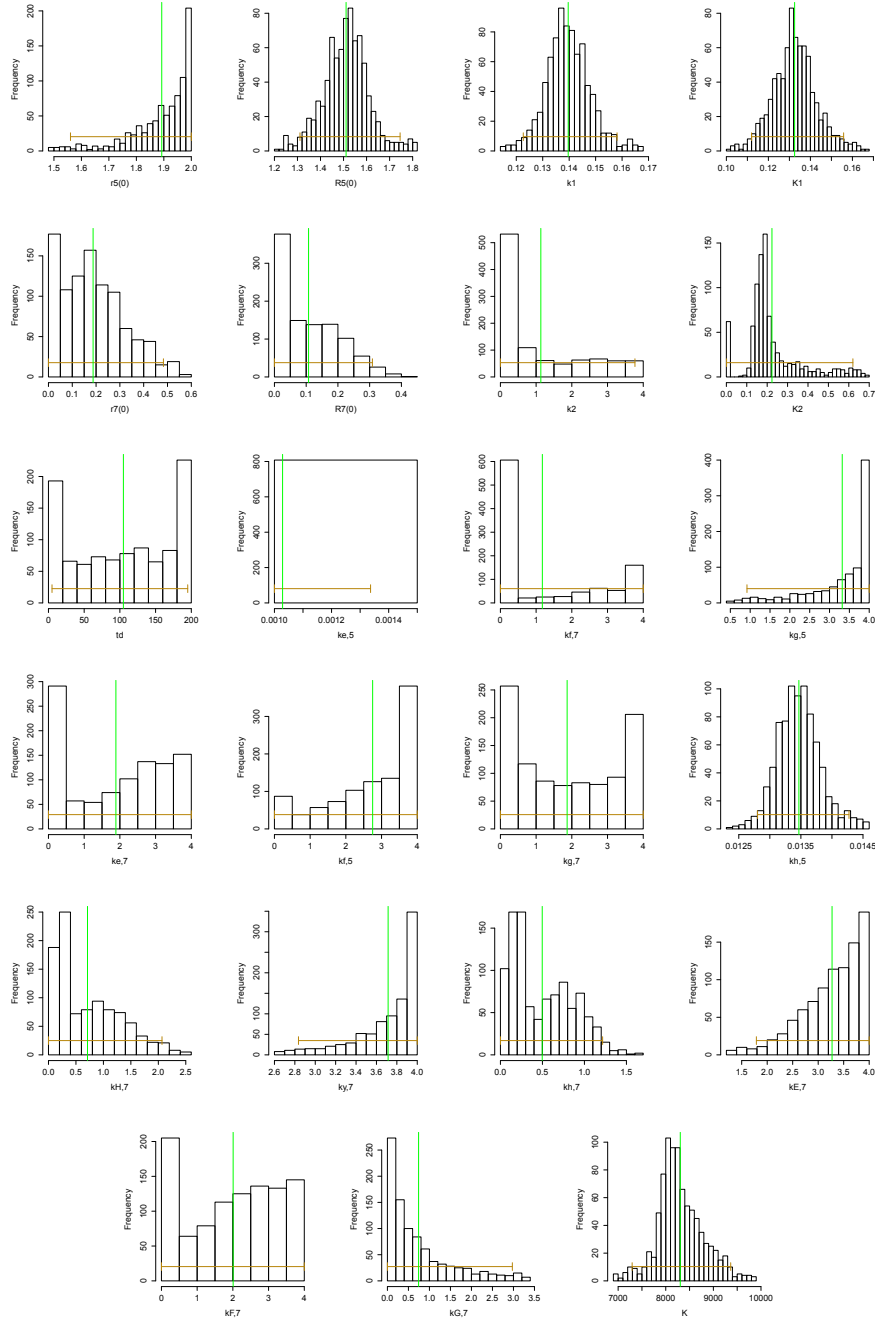

Figure 8: Histograms of the estimated parameter values of the overall top-ranked model obtained using the bootstrap method. In each histogram, the yellow horizontal line represents the 95% confidence interval and the green vertical line represents the mean of the outliers-filtered sample. The width of the bins is calculated according to the Freedman-Diaconis rule.

Top ranked COT model:

$$\begin{aligned}
\frac{dr_5}{dt} &= K_1 - \left(k_1 + \frac{k_{e,5}}{1 + e^{(k_{g,5}-R_5) \cdot k_{f,5}}}\right) \cdot r_5 + k_{h,5} + \frac{k_{H,5} \cdot R_7}{k_{y,5} + R_7} \cdot R_5 \\
\frac{dR_5}{dt} &= \frac{k_{e,5}}{1 + e^{(k_{g,5}-R_5) \cdot k_{f,5}}} \cdot r_5 - k_{h,5} + \frac{k_{H,5} \cdot R_7}{k_{y,5} + R_7} \cdot R_5 \\
\frac{dr_7}{dt} &= K_2 - \left(k_2 + \frac{k_{e,7} \cdot R_7}{k_{g,5} + R_7} + \frac{k_{E,7} \cdot R_5}{k_{G,7} + R_5}\right) \cdot r_7 + k_{h,7} + \frac{k_{H,7} \cdot R_5}{k_{y,7} + R_5} \cdot R_7 \\
\frac{dR_7}{dt} &= \frac{k_{e,7} \cdot R_7}{k_{g,5} + R_7} + \frac{k_{E,7} \cdot R_5}{k_{G,7} + R_5} \cdot r_7 - k_{h,7} + \frac{k_{H,7} \cdot R_5}{k_{y,7} + R_5} \cdot R_7
\end{aligned} \tag{2}$$

Table 4: Summary of the identifiability analysis for the estimated parameter values in the top-ranked model from the COT group using the bootstrap method. The column estimate contains the values in the model obtained using ProBMoT. The column Mean contains the mean of the outliers-filtered sample. The  $C^{lo}$  and  $C^{hi}$  columns contain the lower and upper bound of the 95% confidence interval. The  $C^L$  and  $C^{sh}$  columns contain the length and the shape of the confidence interval, where  $C^L = C^{lo} - C^{hi}$  and  $C^{sh} = \frac{C^{hi} - Mean}{Mean - C^{lo}}$ . Assuming a confidence interval for a normal distribution,  $C^{sh} = 1$  and the interval is symmetric about the mean, the column outliers contains the number of outliers from a sample of 1000.

| Parameter | Estimate  | Mean     | $C^{lo}$ | $C^{hi}$  | $C^L$    | $C^{sh}$ | Outliers |
|-----------|-----------|----------|----------|-----------|----------|----------|----------|
| r5(0)     | 1.201     | 1.491    | 0.085    | 2         | 1.914    | 0.361    | 10       |
| R5(0)     | 1.173     | 1.217    | 0        | 2         | 2        | 0.643    | 0        |
| K1        | 0.073     | 0.097    | 0.001    | 0.177     | 0.176    | 0.842    | 102      |
| k1        | 0.156     | 0.138    | 0.099    | 0.180     | 0.081    | 1.088    | 322      |
| r7(0)     | 0.100     | 0.236    | 0        | 0.800     | 0.800    | 2.391    | 72       |
| R7(0)     | 0.132     | 0.089    | 0        | 0.345     | 0.345    | 2.884    | 51       |
| K2        | 0.160     | 0.238    | 0.001    | 0.721     | 0.720    | 2.040    | 75       |
| k2        | 0.222     | 1.199    | 0.001    | 3.985     | 3.984    | 2.324    | 0        |
| td        | 20.169    | 87.954   | 5        | 195       | 190      | 1.290    | 0        |
| ke,5      | 0.010     | 0.002    | 0.001    | 0.009     | 0.008    | 9.104    | 244      |
| kf,5      | 0.714     | 2.481    | 0.001    | 4         | 3.999    | 0.612    | 0        |
| kg,5      | 0.351     | 2.650    | 0.001    | 4         | 3.999    | 0.509    | 0        |
| ke,7      | 0.096     | 1.233    | 0.001    | 4         | 3.999    | 2.245    | 0        |
| kg,7      | 3.659     | 1.192    | 0.001    | 4         | 3.999    | 2.355    | 0        |
| kH,5      | 0.002     | 0.005    | 0.001    | 0.015     | 0.014    | 2.128    | 180      |
| ky,5      | 0.413     | 0.959    | 0.001    | 4         | 3.999    | 3.171    | 0        |
| kH,7      | 1.695     | 0.579    | 0.001    | 2.212     | 2.211    | 2.825    | 78       |
| ky,7      | 3.754     | 2.576    | 0.001    | 4         | 3.999    | 0.552    | 0        |
| kh,7      | 0.739     | 0.215    | 0.001    | 0.840     | 0.839    | 2.916    | 36       |
| kE,7      | 3.822     | 1.508    | 0.001    | 3.983     | 3.982    | 1.642    | 0        |
| kG,7      | 1.229     | 2.021    | 0.001    | 4         | 3.999    | 0.979    | 0        |
| kh,5      | 0.013     | 0.008    | 0.001    | 0.016     | 0.015    | 1.097    | 218      |
| K         | 12330.653 | 9005.032 | 7121.954 | 15383.476 | 8261.522 | 3.387    | 200      |

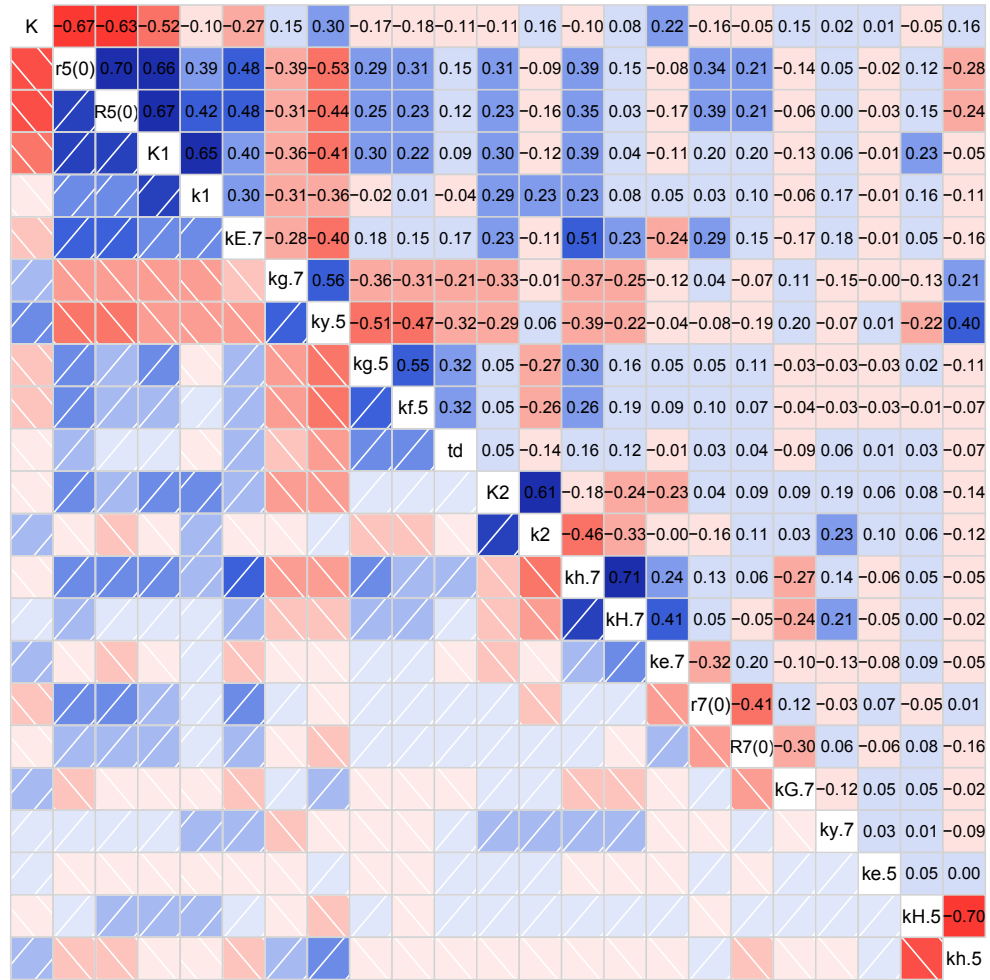

Figure 9: Correlation matrix for the parameters of the top-ranked model from the COT group obtained using the bootstrap method. The names of the parameters for each row/column are shown in the main diagonal. The matrix is symmetric. Above the main diagonal, the values of the correlations correspond to the Pearson correlation coefficient.



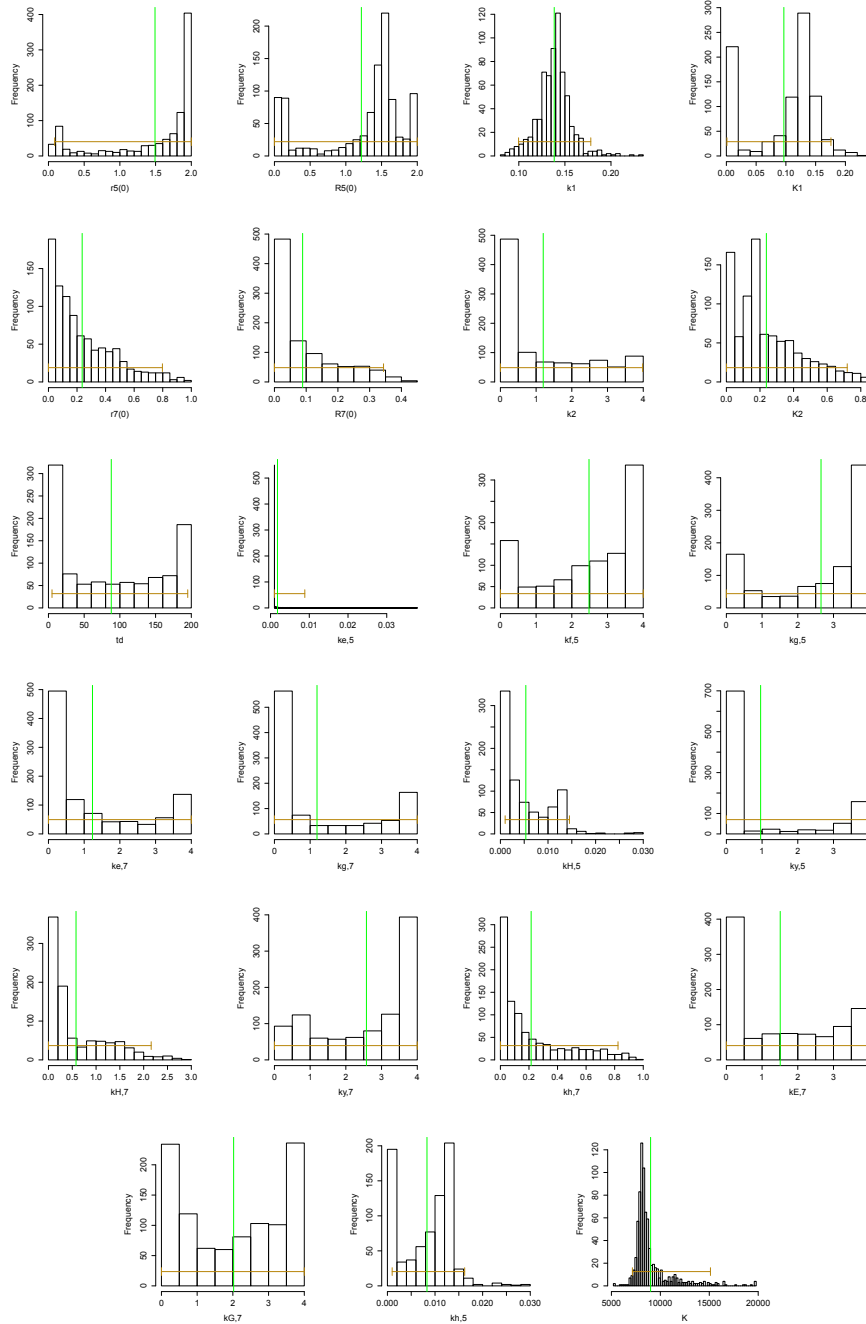

Figure 10: Histograms of the estimated parameter values of the top-ranked model from the COT group obtained using the bootstrap method. In each histogram, the yellow horizontal line represents the 95% confidence interval and the green vertical line represents the mean of the outliers-filtered sample. The width of the bins is calculated according to the Freedman-Diaconis rule.

Top ranked IP model:

$$\begin{aligned}
\frac{dr_5}{dt} &= K_1 - \left(k_1 + \frac{k_{e,5}}{1 + e^{(k_{g,5}-R_5) \cdot k_{f,5}}}\right) \cdot r_5 + k_{h,5} + \frac{k_{H,5} \cdot R_7}{k_{y,5} + R_7} \cdot R_5 \\
\frac{dR_5}{dt} &= \frac{k_{e,5}}{1 + e^{(k_{g,5}-R_5) \cdot k_{f,5}}} \cdot r_5 - k_{h,5} + \frac{k_{H,5} \cdot R_7}{k_{y,5} + R_7} \cdot R_5 \\
\frac{dr_7}{dt} &= K_2 - \left(k_2 + \frac{k_{e,7} \cdot R_7}{k_{g,5} + R_7} + \frac{k_{E,7} \cdot R_5}{k_{G,7} + R_5}\right) \cdot r_7 + k_{h,7} \cdot R_7 \\
\frac{dR_7}{dt} &= \frac{k_{e,7} \cdot R_7}{k_{g,5} + R_7} + \frac{k_{E,7} \cdot R_5}{k_{G,7} + R_5} \cdot r_7 - k_{h,7} \cdot R_7
\end{aligned} \tag{3}$$

Table 5: Summary of the identifiability analysis for the estimated parameter values in the top-ranked model from the IP group using the bootstrap method. The column estimate contains the values in the model obtained using ProBMoT. The column Mean contains the mean of the outliers-filtered sample. The  $C^{lo}$  and  $C^{hi}$  columns contain the lower and upper bound of the 95% confidence interval. The  $C^L$  and  $C^{sh}$  columns contain the length and the shape of the confidence interval, where  $C^L = C^{lo} - C^{hi}$  and  $C^{sh} = \frac{C^{hi} - Mean}{Mean - C^{lo}}$ . Assuming a confidence interval for a normal distribution,  $C^{sh} = 1$  and the interval is symmetric about the mean, the column outliers contains the number of outliers from a sample of 1000.

| Parameter | Estimate | Mean      | $C^{lo}$ | $C^{hi}$  | $C^L$     | $C^{sh}$ | Outliers |
|-----------|----------|-----------|----------|-----------|-----------|----------|----------|
| r5(0)     | 2        | 0.875     | 0        | 2         | 2         | 1.283    | 0        |
| R5(0)     | 1.553    | 0.927     | 0        | 2         | 2         | 1.156    | 0        |
| K1        | 0.092    | 0.088     | 0.001    | 0.345     | 0.344     | 2.950    | 192      |
| k1        | 0.117    | 1.718     | 0.013    | 4         | 3.987     | 1.337    | 0        |
| r7(0)     | 0.002    | 0.110     | 0        | 0.504     | 0.504     | 3.551    | 113      |
| R7(0)     | 0.580    | 0.123     | 0        | 0.537     | 0.537     | 3.341    | 48       |
| K2        | 0.114    | 0.349     | 0.001    | 1.520     | 1.519     | 3.356    | 53       |
| k2        | 0.075    | 1.565     | 0.001    | 3.999     | 3.998     | 1.556    | 0        |
| td        | 5        | 74.272    | 5        | 195       | 190       | 1.742    | 0        |
| ke,5      | 0.001    | 1.019     | 0.001    | 4         | 3.999     | 2.924    | 0        |
| kf,5      | 1.356    | 1.871     | 0.001    | 4         | 3.999     | 1.138    | 0        |
| kg,5      | 3.399    | 2.125     | 0.001    | 4         | 3.999     | 0.882    | 0        |
| ke,7      | 0.754    | 0.579     | 0.001    | 2.322     | 2.321     | 3.010    | 69       |
| kg,7      | 0.001    | 2.937     | 0.001    | 4         | 3.999     | 0.362    | 0        |
| kH,5      | 0.002    | 0.005     | 0.001    | 0.019     | 0.018     | 3.509    | 221      |
| ky,5      | 4        | 1.501     | 0.001    | 4         | 3.999     | 1.664    | 0        |
| kh,7      | 1.259    | 0.008     | 0.001    | 0.046     | 0.045     | 5.798    | 166      |
| kE,7      | 3.422    | 0.025     | 0.001    | 0.278     | 0.277     | 10.573   | 222      |
| kG,7      | 3.915    | 2.190     | 0.001    | 4         | 3.999     | 0.826    | 0        |
| kh,5      | 0.009    | 0.015     | 0.001    | 0.048     | 0.047     | 2.478    | 186      |
| K         | 8118.054 | 22189.124 | 7476.843 | 81297.686 | 73820.843 | 4.017    | 124      |

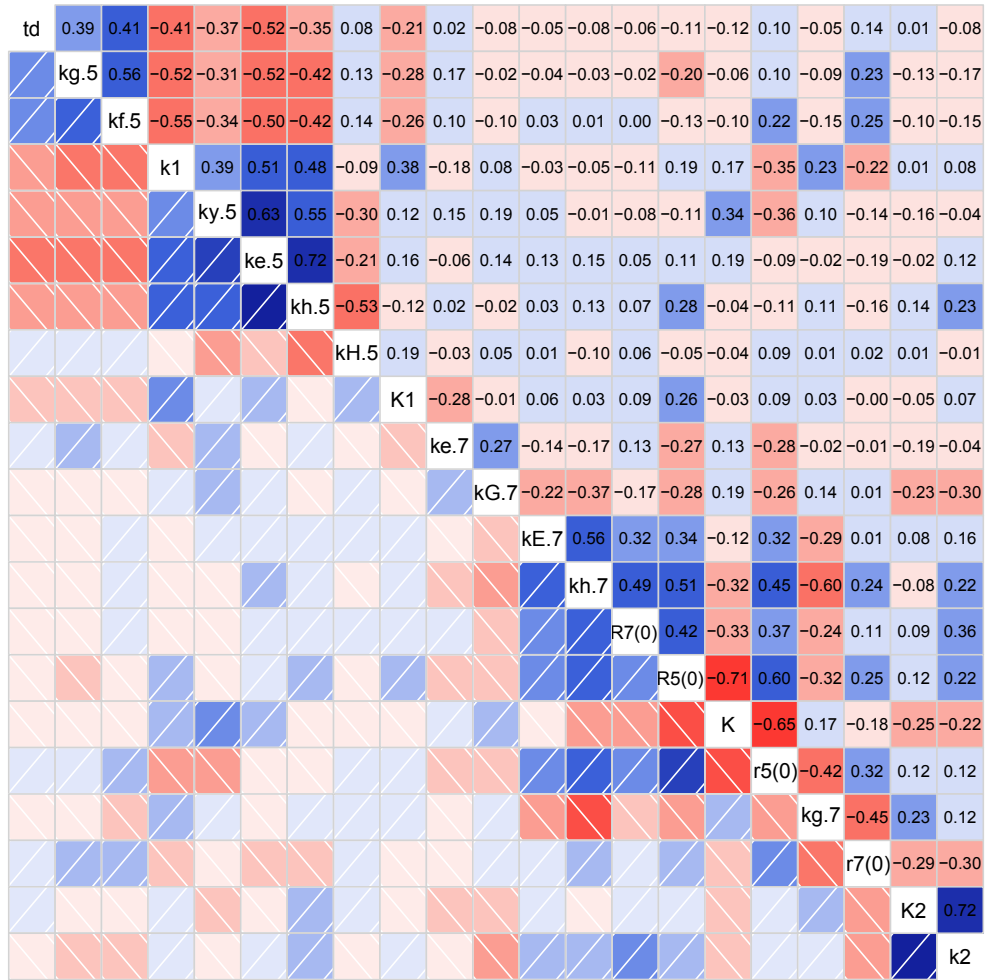

Figure 11: Correlation matrix for the parameters of the top-ranked model from the IP group obtained using the bootstrap method. The names of the parameters for each row/column are shown in the main diagonal. The matrix is symmetric. Above the main diagonal, the values of the correlations correspond to the Pearson correlation coefficient.

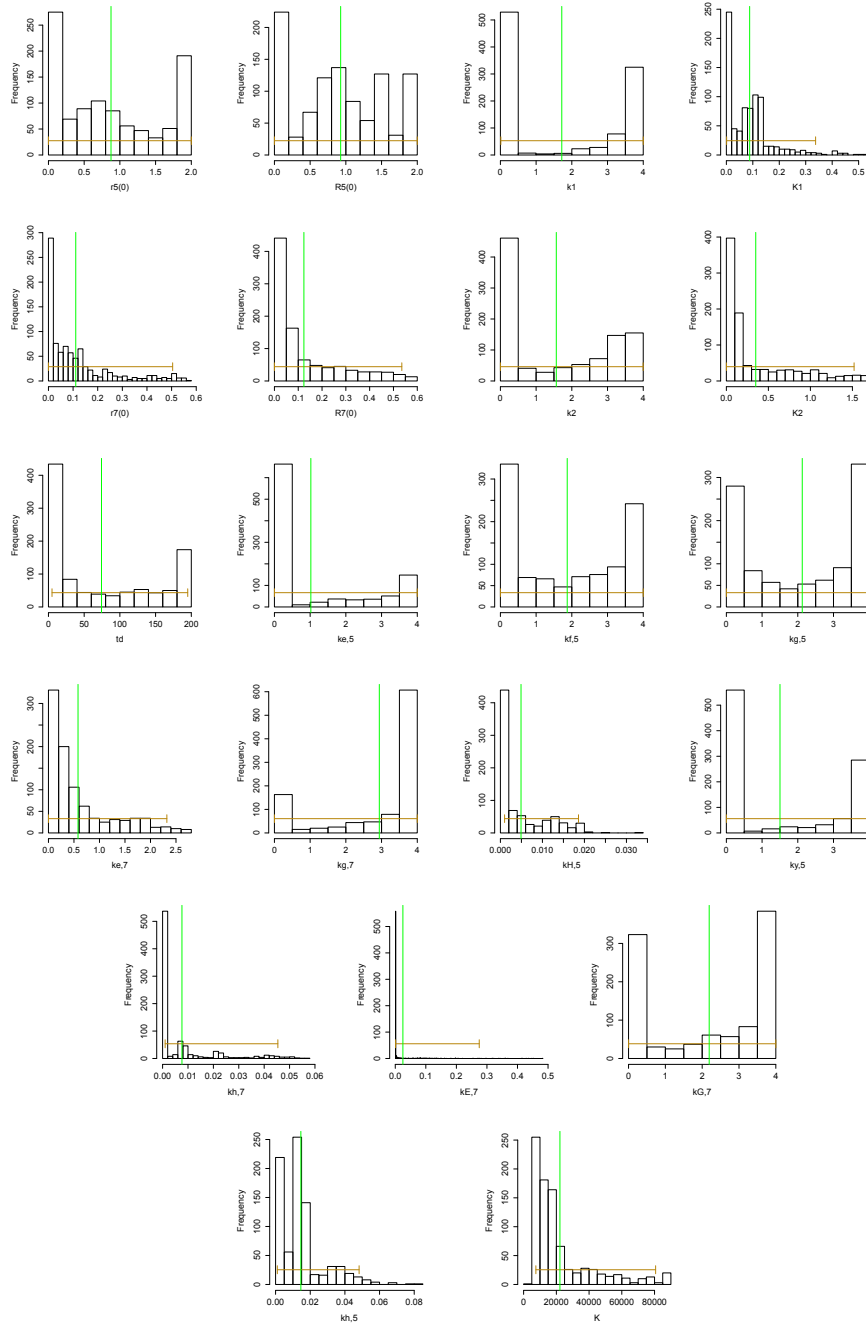

Figure 12: Histograms of the estimated parameter values of the top-ranked model from the IP group obtained using the bootstrap method. In each histogram, the yellow horizontal line represents the 95% confidence interval and the green vertical line represents the mean of the outliers-filtered sample. The width of the bins is calculated according to the Freedman-Diaconis rule.
